# Supplementary material for: Effect of Biogenic Silver Nanoparticles on the Quorum-Sensing System of Pseudomonas aeruginosa PAO1 and PA14
Source: Microorganisms. 2022 Aug 30;10(9):1755. doi: 10.3390/microorganisms10091755 (PMC9504124; doi:10.3390/microorganisms10091755)
Supplement: Supplementary file 1 [file microorganisms-10-01755-s001.zip › microorganisms-1850931-supplementary.pdf]

**Table S1.** Comparison of biofilm formation methods.

| <b>This Work</b>                                                                                                       | <b>Ramos-Vivas et al. [1]</b>                                                                                                                |
|------------------------------------------------------------------------------------------------------------------------|----------------------------------------------------------------------------------------------------------------------------------------------|
| Bacterial isolates were cultured on LB agar at 37 °C for 24 h.                                                         | Bacterial isolates were cultured on LB agar at 37 °C for 24 h with shaking                                                                   |
| To each well were added 180 µL of LB broth and 20 µL of <i>P. aeruginosa</i> inoculum and incubated at 37 °C for 24 h. | Twenty-five microliters were placed in each well containing 1.5 mL of culture medium. The plates were incubated for 48 h at 37 °C in static. |
| Each well was discarded and the cell layer washed three times with phosphate buffer solution (PBS, pH 7.2)             | Planktonic cells were removed and wells containing biofilms were rinsed three times with distilled water                                     |
| Fixed with 250 µL of absolute methanol PA for 10 min                                                                   | -                                                                                                                                            |
| Stained with a 1.0 % <i>w/v</i> aqueous solution of crystal violet for 15 min.                                         | The remaining adherent bacteria were stained with 2 mL/well of crystal violet (0.7%) for 12 min.                                             |
| Each well washed three times with ultrapure water.                                                                     | Excess stain was removed by washes with distilled water.                                                                                     |
| Treated with 250 µL of 33% <i>v/v</i> glacial acetic acid.                                                             | Treated with 33% <i>v/v</i> glacial acetic acid.                                                                                             |
| Absorbance readings were taken at 620 nm.                                                                              | Absorbance readings were taken at 620 nm.                                                                                                    |

## Reference

1. Ramos-Vivas, J.; Chapartegui-González, I.; Fernández-Martínez, M.; González-Rico, C.; Fortún, J.; et al. Biofilm formation by multidrug resistant Enterobacteriaceae strains isolated from solid organ transplant recipients. *Sci. Rep.* **2019**, *9*, 8928.
